# Supplementary material
Source: publisher figshare collection journal article supplement (https://gsajournals.figshare.com/ndownloader/files/14277707)
Supplement: Supplementary file 1 [file 14277707]

## Sheet: Cover page
	Table S1 Lists of all dsRNA fragments with annotated muscle phenotypes from first-pass screens upon larval and pupal dsRNA injections.
	iB numbers denote the original dsRNA fragments used in primary screens and are grouped according to phenotypic classes. The numbers can be used to access full information on the respective phenotypes and corresponding genes in the iBeetle database (http://ibeetle-base.uni-goettingen.de, “Gene search”). The database entries were generated during the screen by the different screeners. Note that som…

## Sheet: Pupal Inj., Phenotypes
	Classifications of Muscle Phenotypes in Late Embryos/1st Instar Larvae from Pupal Injection Screen
	Phenotypes are based on re-assessed entries and images in iBeetle database (http://ibeetle-base.uni-goettingen.de) from primary screen
	Listed are the iB numbers of the injected dsRNA fragments, which can be searched in the iBeetle database
	1. Screening Phase								2. Screening Phase
		shape								shape
	missing	broader	thinner	dumbbell shaped	rounded	orientation	leg muscles		missing	broader	thinner	dumbbell shaped	rounded	orientation	leg muscles
	00070	01111	00018	01284	00492	03106	06557		00843	08509	02366	09801	00184	00811	10081
	00084		00564	01718	00065	00120	00092		00932		03600		05439	08933
	00174		01738	02913	00289	02515	00615		00988		04206		06673	10133
	00330		02197		00757	03194	00829		03716		05156		06855
	00388		02205		00956	03243	00837		03837		05218		07501
	00525		02206		01159	03619	01398		04210		06721		07647
	00728		02573		01306	05339	01476		04285		06741		07815
	00767		02588		01319	05528	01553		04331		06918		08029
	00819		02937		01705		01701		04460		06977		08225
	00863		03403		01726		01794		05223		07431		08574
	01231		03525		02248		05163		06842		07870		08634
	01470		03913		02610		06072		07025		08003		08660
	01494		04697		02982		06237		07523		08065		08779
	01507		04877		03227				07545		08150		08916
	01656		05130		03251				07983		08279		10670
	01683		05806		03398				08012		08301
	01770		06061		03453				08205		08391
	01883		06574		03580				08824		08907
	02184				03581				08893		09172
	02389				03800				09067		09380
	02520				03857				09106		09406
	02543				04483				09112		09422
	02631				05697				09244		09433
	02698				05751				09401		09825
	03004								10041		10005
	03102								11050		10029
	03455								11057		10051
	03487										10066
	03539										10545
	03560										10591
	03568										10638
	03586
	03750
	03821
	03831
	03844
	04153
	04216
	04316
	04730
	04897
	05149
	05251
	05264
	05278
	05304
	05309
	05383
	05461
	05494
	05626
	05637
	05751
	05757
	05796
	06366
	06703
	06749
	07039

## Sheet: Larval Inj., Phenotypes
Classifications of Muscle Phenotypes in Late Pupae from Larval Injection Screen
Phenotypes are based on re-assessed entries and images in iBeetle database (http://ibeetle-base.uni-goettingen.de) from primary screen
Listed are the iB numbers of the injected dsRNA fragments, which can be searched in the iBeetle database
	shape			rounded
missing	broader	thinner	shortened	rounded	fragmented	orientation	more muscles
00008	00067	00827	00119	01526	00367	00133	00334
01187	02211	02254	00227	02209	00514	01865	00463
01221	02698	02505	00234	03476	00551	05280	00754
01635	03421	03944	00260	04966	00794	05522	02591
01722	03560	04042	00272	06276	02205	05543	03469
01762	04299	04897	00497		04986		04065
01798	04987	05169	00812		05008		04877
01805	05277	06314	00885				05205
03663	06449	02913	01328				05728
03939	06483		01669
04015			01680
04113			01759
04391			02548
04931			03422
05014			03444
05272			03555
05688			03793
06264			03872
			03896
			03900
			03968
			03998
			04121
			04475
			04883
			05053
			05103
			05179
			06249
			06303
			06361
			06393
			01783

## Sheet: Larval Inj., Annotations&D.mel.
Tribolium genes, Drosophila orthologs, and Annotations of Muscle Phenotypes of Corresponding iB dsRNAs in Late Pupae from Larval Injection Screen
Phenotypes are based on original and reassessed images in iBeetle database (http://ibeetle-base.uni-goettingen.de) from primary screen
iB#	T. cas. gene	D. mel. ortholog	phenotype (annotations from screen)	phenotype (reassessed*)	category
iB_00008	TC000054	GstO3 - Glutathione S transferase O3 (CG6776)	longitudinal dorsal thoracic muscles partially not present	confirmed	missing
iB_00067	TC032222	ash1 - absent, small, or homeotic discs 1 (CG8887)	oblique dorsal thoracic muscles shortened, sometimes orientation irregular, broader	muscles broader confirmed, shortening not confirmed	muscle shape
iB_00119	TC000529	wapl - wings apart-like (CG3707)	dorsal thoracic muscles potentially differentiation irregular	shortened	shortened
iB_00133	TC000591	sba - six-banded (CG13598)	oblique dorsal thoracic muscles partially shortened	more likely wrong orientation	orientation
iB_00227	TC032209	gro - groucho (CG8384)	oblique dorsal thoracic muscles slightly shortened	shortened (weak effect)	shortened
iB_00234	TC001262	CG31198 - (CG31198)	oblique dorsal thoracic muscles anterior shortened	confirmed	shortened
iB_00260	TC001559	Spred - Sprouty-related protein with EVH-1 domain (CG10155)	oblique dorsal thoracic muscles anterior shortened	clearly visible	shortened
iB_00272	TC001622	CG8031 - (CG8031)	oblique dorsal thoracic muscles anterior shortened, partially not present	confirmed	shortened
iB_00334	TC002141	Rac1 - Rac1 (CG2248)	dorsal thoracic muscles number increased, muscles thinner	confirmed (potentially split)	more muscles
iB_00367	TC032683	ltl - larval translucida (CG32372)	oblique dorsal thoracic muscles fragmented	confirmed (rounded)	rounded
iB_00463	TC002887	mr - morula (CG3060)	oblique dorsal thoracic muscles number increased, muscles thinner + longitudinal dorsal thoracic muscles number increased	confirmed	more muscles
iB_00497	TC003004	Rbbp5 - Retinoblastoma binding protein 5 (CG5585)	oblique dorsal thoracic muscles shortened	confirmed	shortened
iB_00514	TC003094	E(z) - Enhancer of zeste (CG6502)	oblique dorsal thoracic muscles fragmented	confirmed (rounded)	rounded
iB_00551	TC003310	clu - clueless (CG8443)	oblique dorsal thoracic muscles thinner, partially fragmented	confirmed (rounded)	rounded
iB_00754	TC031464	Utx - Utx histone demethylase (CG5640)	oblique dorsal thoracic muscles size broader, number increased	confirmed	more muscles
iB_00794	TC004992	DNApol-delta - DNA-polymerase-delta (CG5949)	oblique dorsal thoracic muscles fragmented	confirmed (rounded)	rounded
iB_00812	TC005175	UbcE2H - Ubiquitin conjugating enzyme E2H (CG2257)	oblique dorsal thoracic muscles partially shortened	confirmed	shortened
iB_00827	TC005319	CG32500 - (CG32500)	oblique dorsal thoracic muscles thinner	weak effect	muscle shape
iB_00885	TC005562	Esp - Epidermal stripes and patches (CG7005)	oblique dorsal thoracic muscles size shortened	confirmed	shortened
iB_01187	TC007434	Ubr1 - Ubr1 ubiquitin ligase (CG9086)	dorsal thoracic muscles partially not present	confirmed	missing
iB_01221	TC007565	Cka - Connector of kinase to AP-1 (CG7392)	dorsal thoracic muscles not present	confirmed	missing
iB_01328	TC008256	Etf-QO - Electron transfer flavoprotein-ubiquinone oxidoreductase (CG12140)	longitudinal dorsal thoracic muscles position irregular	looks shortened	shortened
iB_01526	TC009315	vlc - vulcan (CG8390)	oblique dorsal thoracic muscles partially rounded	confirmed	rounded
iB_01635	TC033768	nolo - no long nerve cord (CG31619)	dorsal thoracic muscles mostly not present	confirmed	missing
iB_01669	TC010336	CG1677 - (CG1677)	dorsal thoracic muscles fluorescence decreased, shortened	shortening confirmed	shortened
iB_01680	TC010395	---	dorsal thoracic muscles irregular	looks shortened	shortened
iB_01722	TC010657	Meltrin - Meltrin (CG7649)	longitudinal dorsal thoracic muscles number irregular, partially shortened	1 longitudinal muscle missing + clearly shortened	missing
iB_01759	TC010904	CG7542 - (CG7542)	dorsal thoracic muscles sometimes structure irregular	looks shortened	shortened
iB_01762	TC010914	Pak - p21-activated kinase (CG10295)	longitudinal dorsal thoracic muscles mostly not present, thinner	confirmed	missing
iB_01798	TC011075	Sclp - Sclp (CG2471)	oblique dorsal thoracic muscles median not present	confirmed	missing
iB_01805	TC011114	zfh1 - Zn finger homeodomain 1 (CG1322)	oblique dorsal thoracic muscles thinner, decreased; longitudinal dorsal thoracic muscles sometimes thinner	confirmed	missing
iB_01865	TC011552	---	longitudinal dorsal thoracic muscles not present	longitudinal muscles with wrong orientation	orientation
iB_02205	TC013784	Nost - Nostrin (CG42388)	oblique dorsal thoracic muscles need term anteriorshape irregular	fragmented/ rounded	rounded
iB_02209	TC013803	dock - dreadlocks (CG3727)	longitudinal dorsal thoracic muscles partially not present	detached/ rounded	rounded
iB_02211	TC013835	CG6617 - (CG6617)	oblique dorsal thoracic muscles median broader, median slightly shortened	weak effect	muscle shape
iB_02254	TC014143	Pka-C3 - Protein kinase, cAMP-dependent, catalytic subunit 3 (CG6117)	oblique dorsal thoracic muscles median slightly elongated	weak effect	muscle shape
iB_02505	TC015675	l(2)not - lethal (2) neighbor of tid (CG4084)	oblique dorsal thoracic muscles median slightly thinner	weak effect	muscle shape
iB_02548	TC031492	CG5734 - (CG5734)	oblique dorsal thoracic muscles need term slightly shortened	shortened, but also split	shortened
iB_02591	TC030577	croc - crocodile (CG5069)	oblique dorsal thoracic muscles median sometimes split	confirmed	more muscles
iB_02698	TC032383	LanA - Laminin A (CG10236)	oblique dorsal thoracic muscles median slightly broader	confirmed	muscle shape
iB_02913	TC012367	CG43143 - (CG43143)	oblique dorsal thoracic muscles irregular, not present, thinner	both phenotypes confirmed	muscle shape
iB_03421	TC002620	jim - jim (CG11352)	longitudinal dorsal thoracic muscles fluorescence decreased	weak effect, muscles perhaps broader	muscle shape
iB_03422	TC002621	jim - jim (CG11352)	longitudinal dorsal thoracic muscles fluorescence decreased	weak effect, perhaps shortened	shortened
iB_03444	TC002731	CG16953 - (CG16953)	oblique dorsal thoracic muscles shortened + longitudinal dorsal thoracic muscles fluorescence decreased	confirmed	shortened
iB_03469	TC002914	kirre - kin of irre (CG3653), rst - roughest (CG4125)	oblique dorsal thoracic muscles median broader, median shortened	clearly more dorsal muscles or dorsal muscle split	more muscles
iB_03476	TC002959	Tsc1 - Tsc1 (CG6147)	oblique dorsal thoracic muscles partially rounded	weak effect	rounded
iB_03555	TC003429	Krn - Keren (CG32179)	longitudinal dorsal thoracic muscles fluorescence decreased; oblique dorsal thoracic muscles thinner, size shortened	weak effect	shortened
iB_03560	TC003460	LanA - Laminin A (CG10236)	longitudinal dorsal thoracic muscles fluorescence decreased, oblique dorsal thoracic muscles size increased	weak effect	muscle shape
iB_03663	TC003984	MESK2 - Misexpression suppressor of KSR 2 (CG15669)	dorsal thoracic muscles pattern irregular	shortened, clearly muscles missing, others thinner	missing
iB_03793	TC034531	grh - grainy head (CG42311)	oblique dorsal thoracic muscles shortened	poor image	shortened
iB_03872	TC004915	---	longitudinal dorsal thoracic muscles shape irregular, oblique dorsal thoracic muscles median size shortened	confirmed	shortened
iB_03896	TC005068	CG11999 - (CG11999)	dorsal thoracic muscles size shortened	confirmed	shortened
iB_03900	TC005083	scra - scraps (CG2092)	oblique dorsal thoracic muscles sometimes size shortened	confirmed	shortened
iB_03939	TC005341	shep - alan shepard (CG32423)	dorsal thoracic muscles structure thinner	muscles thinner, but some clearly missing	missing
iB_03944	TC005371	CG1236 - (CG1236)	oblique dorsal thoracic muscles potentially structure irregular	shortened, thinner, some potentially missing	muscle shape
iB_03968	TC005500	CG4678 - (CG4678)	oblique dorsal thoracic muscles need term distalsize shortened	confirmed	shortened
iB_03998	TC005675	MYPT-75D - MYPT-75D (CG6896)	oblique dorsal thoracic muscles size shortened	confirmed	shortened
iB_04015	TC034050	lz - lozenge (CG1689)	longitudinal dorsal thoracic muscles structure not present, size shortened	one longitudinal muscle is missing, oblique muscles are shortened	missing
iB_04042	TC005944	---	dorsal thoracic muscles structure irregular	muscle thinner, some missing	muscle shape
iB_04065	TC033943	Snoo - Sno oncogene (CG34421)	oblique dorsal thoracic muscles median sometimes structure duplicated	confirmed	more muscles
iB_04113	TC034042	CG16940 - (CG16940)	longitudinal dorsal thoracic muscles mostly structure not present + oblique dorsal thoracic muscles distal mostly structure shortened	one longitudinal muscle missing, oblique muscles shortened	missing
iB_04121	TC006359	CG8841 - (CG8841)	oblique dorsal thoracic muscles structure shortened	confirmed	shortened
iB_04299	TC007250	boi - brother of ihog (CG32796)	oblique dorsal thoracic muscles size shortened, broader	confirmed	muscle shape
iB_04391	TC007872	ZnT63C - Zinc transporter 63C (CG17723)	longitudinal dorsal thoracic muscles fluorescence decreased + oblique dorsal thoracic muscles median partially not present, median partiallyf ragmented	weak effect	missing
iB_04476	TC008382	PPP4R2r - Protein phosphatase 4 regulatory subunit 2-related protein (CG2890)	oblique dorsal thoracic muscles slightly median shortened	confirmed	shortened
iB_04877	TC010596	pros - prospero (CG17228)	longitudinal dorsal thoracic muscles posterior position irregular	looks like 4 instead of 3 longitudinal muscles	more muscles
iB_04883	TC010635	RtcB - RtcB-like (CG9987)	oblique dorsal thoracic muscles orientation irregular, shortened, lateral decreased -	shortening confirmed, mis-orientation not confirmed	shortened
iB_04897	TC010693	CG4266 - (CG4266)	oblique dorsal thoracic muscles thinner	weak effect	muscle shape
iB_04931	TC033006	vg - vestigial (CG3830)	dorsal thoracic muscles not present	confirmed	missing
iB_04966	TC011056	TBCD - tubulin folding cofactor D (CG7261)	dorsal thoracic muscles partially not present, partially rounded	confirmed	rounded
iB_04986	TC011206	Ube3a - Ubiquitin protein ligase E3A (CG6190)	oblique dorsal thoracic muscles fragmented	confirmed (rounded)	rounded
iB_04987	TC011210	ash2 - absent, small, or homeotic discs 2 (CG6677)	oblique dorsal thoracic muscles median size broader	confirmed	muscle shape
iB_05008	TC031361	tmod - tropomodulin (CG1539)	oblique dorsal thoracic muscles fragmented	confirmed (rounded)	rounded
iB_05014	TC011325	CG6066 - (CG6066)	oblique dorsal thoracic muscles partially not present, partially fragmented	confirmed	missing
iB_05053	TC011542	Asciz - ASCIZ homolog (CG14962)	oblique dorsal thoracic muscles shortened	confirmed	shortened
iB_05103	TC034441	CG32432 - (CG32432)	oblique dorsal thoracic muscles distal size shortened	weak effect	shortened
iB_05169	TC012100	Ubc2 - Ubiquitin conjugating enzyme 2 (CG6720)	oblique dorsal thoracic muscles thinner	weak effect	muscle shape
iB_05179	TC034296	Tango1 - Transport and Golgi organization 1 (CG11098)	oblique dorsal thoracic muscles median size shortened, thinner + longitudinal dorsal thoracic muscles fluorescence decreased	weak effect	shortened
iB_05205	TC012276	smp-30 - Senescence marker protein-30 (CG7390)	oblique dorsal thoracic muscles median slightly split	confirmed	more muscles
iB_05272	TC012571	Mob4 - (CG3403)	dorsal thoracic muscles mostly not present	confirmed	missing
iB_05277	TC034399	mmd - mind-meld (CG42252)	oblique dorsal thoracic muscles median slightly broader	broadening confirmed, also split?	muscle shape
iB_05280	TC034405	RhoGAP19D - Rho GTPase activating protein at 19D (CG1412)	oblique dorsal thoracic muscles median ap-orientation irregular	confirmed	orientation
iB_05522	TC013912	Asx - Additional sex combs (CG8787)	oblique dorsal thoracic muscles median shortened, orientation irregular	confirmed	orientation
iB_05543	TC014017	gbb - glass bottom boat (CG5562)	oblique dorsal thoracic muscles median orientation irregular	confirmed	orientation
iB_05688	TC014773	wb - wing blister (CG42677)	oblique dorsal thoracic muscles partially not present + longitudinal dorsal thoracic muscles potentially partially not present	weak effect	missing
iB_05728	TC034744	Gug - Grunge (CG6964)	dorsal thoracic muscles potentially number increased	confirmed	more muscles
iB_06249	TC008111	rig - rigor mortis (CG30149)	dorsal thoracic muscles irregular	shortened (poor images)	shortened
iB_06264	TC009249	CG18004 - (CG18004)	oblique dorsal thoracic muscles shortened + longitudinal dorsal thoracic muscles not present	weak effect	missing
iB_06276	TC009721	Eb1 - Eb1 (CG3265)	dorsal thoracic muscles irregular, fragmented, split, potentially rounded + longitudinal dorsal thoracic muscles broader	primarily rounded	rounded
iB_06303	TC012524	Ent2 - Equilibrative nucleoside transporter 2 (CG31911)	oblique dorsal thoracic muscles distal orientation irregular, shortened + dorsal thoracic muscles thinner + longitudinal dorsal thoracic muscles median thinner	shortening confirmed	shortened
iB_06314	TC013372	abo - abnormal oocyte (CG6093)	dorsal thoracic muscles mostly not present	muscle thinner, some missing	muscle shape
iB_06361	TC031492	CG5734 - (CG5734)	oblique dorsal thoracic muscles potentially shortened	confirmed	shortened
iB_06393	TC005331	CG17454 - (CG17454)	dorsal thoracic muscles irregular	shortened	shortened
iB_06449	TC012055	Ttd14 - TRPL translocation defect 14 (CG30118)	longitudinal dorsal thoracic muscles potentially irregular	oblique muscles broader	muscle shape
iB_06483	TC030657	CG9410 - (CG9410)	oblique dorsal thoracic muscles median potentially broader	confirmed	muscle shape
*based on iBeetle database images
